# Supplementary material for: LGR5 in breast cancer and ductal carcinoma in situ: a diagnostic and prognostic biomarker and a therapeutic target
Source: PubMed Central journal article supplement (PMC7285764; doi:10.1186/s12885-020-06986-z), 2020-06-10
Supplement: 12885_2020_6986_MOESM1_ESM.pdf [file 12885_2020_6986_MOESM1_ESM.pdf]

Additional Figure 1

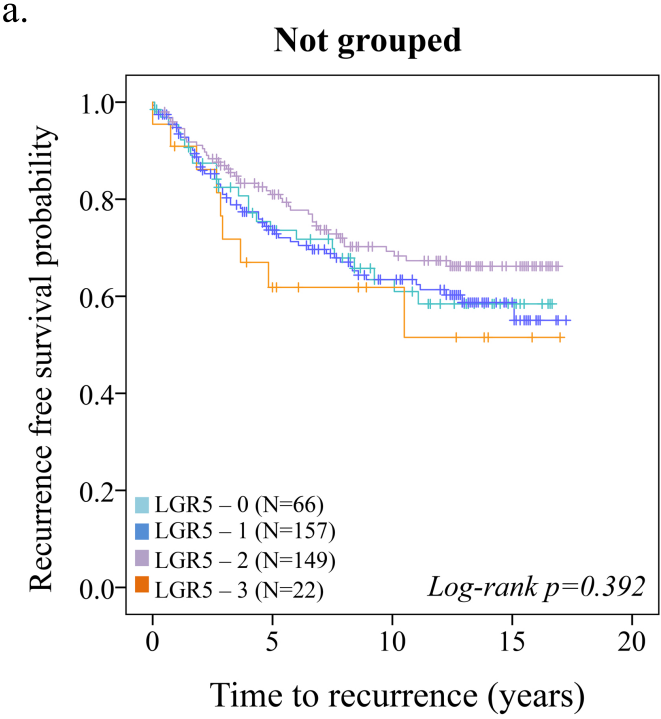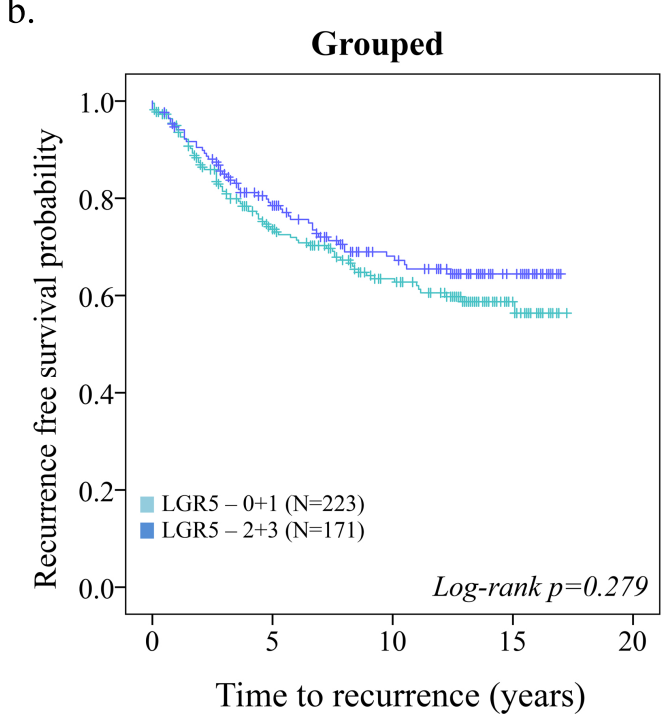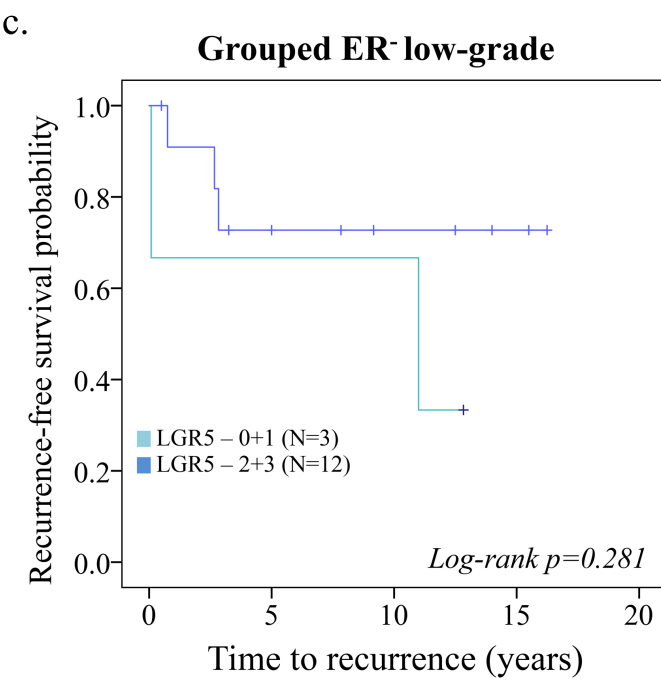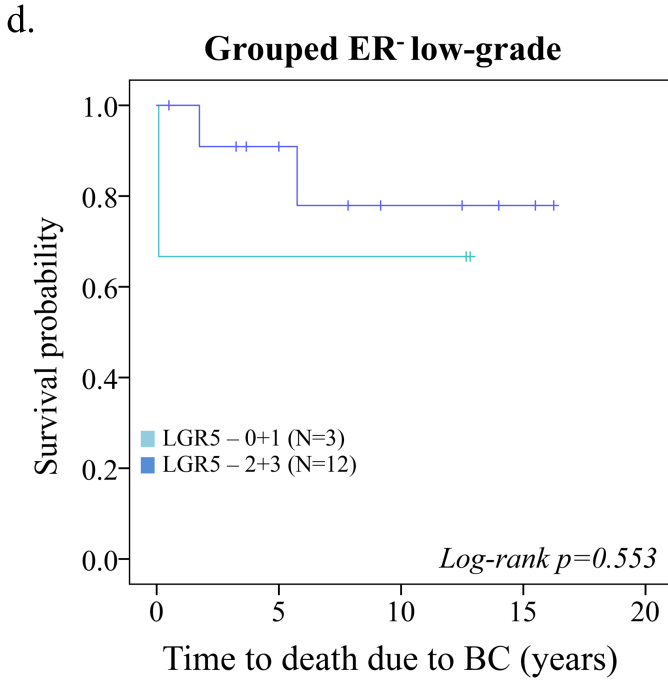

Additional Figure 2

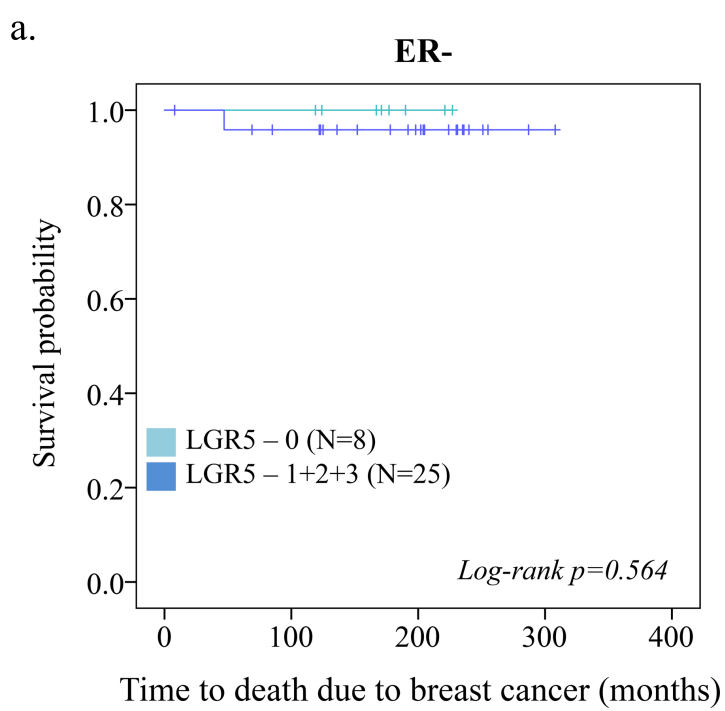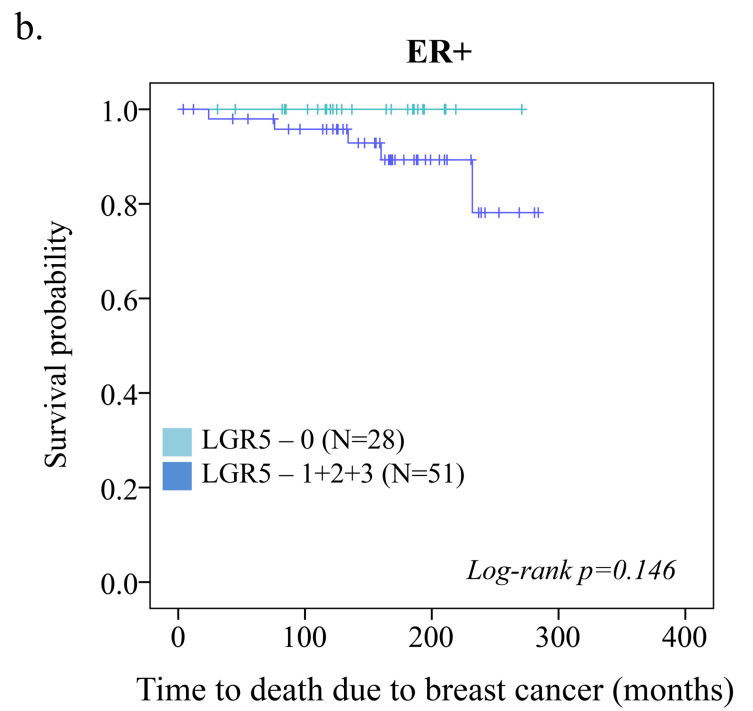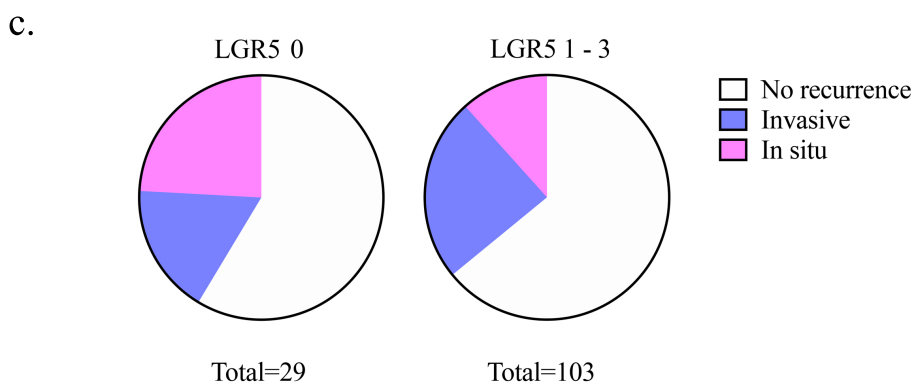

### Additional Figure 3

a.

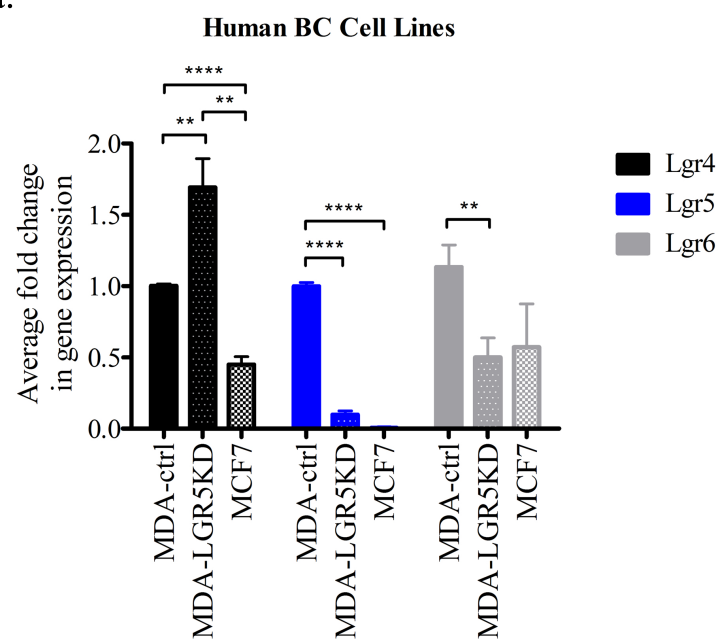

b.

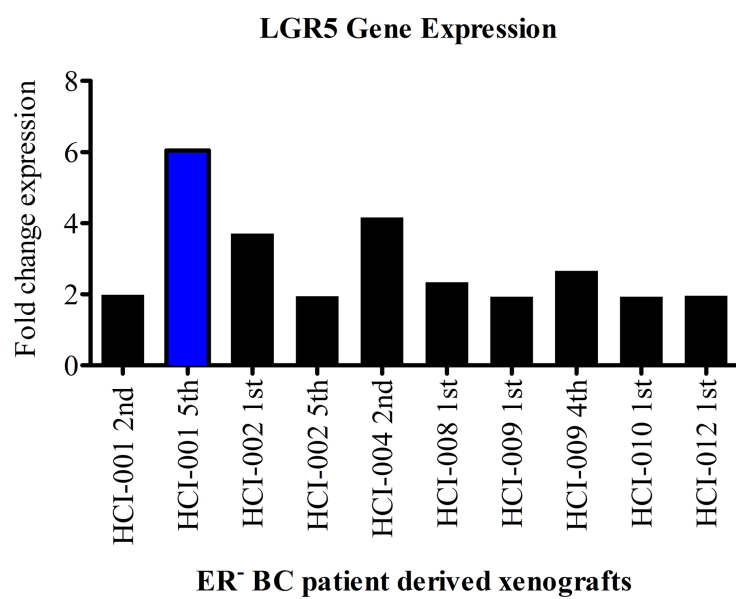

Additional Table 1 Cox regression analyses for recurrence free survival in women with ER+ primary breast cancer

| Variable         | HR          | (95% CI)    | P value      | HR            | (95% CI)    | P value      |
|------------------|-------------|-------------|--------------|---------------|-------------|--------------|
|                  | Univariable |             |              | Multivariable |             |              |
| Tumor size       |             |             |              |               |             |              |
| ≤20 vs >20       | 2.16        | (1.50-3.11) | <b>0.000</b> | 1.18          | (0.77-1.82) | 0.45         |
| Nodal metastasis |             |             |              |               |             |              |
| - vs +           | 3.33        | (2.28-4.89) | <b>0.000</b> | 2.36          | (1.53-3.62) | <b>0.000</b> |
| NHG              |             |             |              |               |             |              |
| 1, 2 vs 3        | 3.30        | (2.78-4.60) | <b>0.000</b> | 2.69          | (1.78-4.06) | <b>0.000</b> |
| LGR5             |             |             |              |               |             |              |
| low vs high      | 0.64        | (0.43-0.95) | <b>0.028</b> | 0.75          | (0.49-1.15) | 0.18         |

Abbreviations: HR, hazard ratio; NHG, Nottingham histologic score

LGR5, Leucine-rich repeat-containing G-protein coupled receptor 5. Bold indicates P-value <0.05

Additional Table 2 Cox regression analyses for recurrence free survival (RFS) in women with high-grade ER- primary breast cancer

| Variable         | HR          | (95% CI)    | P value      | HR            | (95% CI)    | P value      |
|------------------|-------------|-------------|--------------|---------------|-------------|--------------|
|                  | Univariable |             |              | Multivariable |             |              |
| Tumor size       |             |             |              |               |             |              |
| ≤20 vs >20       | 1.54        | (0.66-3.58) | 0.311        | 2.26          | (0.77-6.65) | 0.14         |
| Nodal metastasis |             |             |              |               |             |              |
| - vs +           | 2.50        | (1.04-6.04) | <b>0.041</b> | 2.91          | (1.07-7.88) | <b>0.036</b> |
| LGR5             |             |             |              |               |             |              |
| low vs high      | 3.36        | (1.29-8.77) | <b>0.013</b> | 2.64          | (0.94-7.43) | 0.065        |

Abbreviations: HR, hazard ratio; CI, confidence intervals; NHG, Nottingham histologic score

LGR5, Leucine-rich repeat-containing G-protein coupled receptor 5. Bold indicates P-value <0.05

Additional Table 3 Cox regression analyses for breast cancer specific survival (BCSS) in women with high-grade ER- primary breast cancer

| Variable         | HR          | (95% CI)     | P value      | HR            | (95% CI)     | P value      |
|------------------|-------------|--------------|--------------|---------------|--------------|--------------|
|                  | Univariable |              |              | Multivariable |              |              |
| Tumor size       |             |              |              |               |              |              |
| ≤20 vs >20       | 2.12        | (0.79-5.69)  | 0.134        | 3.21          | (0.84-12.29) | 0.088        |
| Nodal metastasis |             |              |              |               |              |              |
| - vs +           | 4.20        | (1.48-11.94) | <b>0.007</b> | 4.71          | 1.38-16.18   | <b>0.014</b> |
| LGR5             |             |              |              |               |              |              |
| low vs high      | 4.03        | (1.29-12.55) | <b>0.016</b> | 3.08          | (0.89-10.60) | 0.075        |

Abbreviations: HR, hazard ratio; CI, confidence intervals; NHG, Nottingham histologic score

LGR5, Leucine-rich repeat-containing G-protein coupled receptor 5. Bold indicates P-value <0.05
